# Supplementary material for: Semantics-based plausible reasoning to extend the knowledge coverage of medical knowledge bases for improved clinical decision support
Source: Springer Nature journal article supplement (doi:10.1186/s13040-017-0123-y), 2017-02-10
Supplement: 13040_2017_123_MOESM3_ESM.pdf [file 13040_2017_123_MOESM3_ESM.pdf]

| Attribute                     | Original Data<br>(# missing) | Datasets with 5% Missing |              |              |              |              | Datasets with 10% Missing |               |               |               |               | Datasets with 15% Missing |               |               |               |               | Datasets with 20% Missing |               |               |               |               |
|-------------------------------|------------------------------|--------------------------|--------------|--------------|--------------|--------------|---------------------------|---------------|---------------|---------------|---------------|---------------------------|---------------|---------------|---------------|---------------|---------------------------|---------------|---------------|---------------|---------------|
|                               |                              | Dataset #5-1*            | Dataset #5-2 | Dataset #5-3 | Dataset #5-4 | Dataset #5-5 | Dataset #10-1             | Dataset #10-2 | Dataset #10-3 | Dataset #10-4 | Dataset #10-5 | Dataset #15-1             | Dataset #15-2 | Dataset #15-3 | Dataset #15-4 | Dataset #15-5 | Dataset #20-1             | Dataset #20-2 | Dataset #20-3 | Dataset #20-4 | Dataset #20-5 |
| Age                           | 0                            | 11                       | 5            | 7            | 7            | 3            | 13                        | 13            | 16            | 15            | 12            | 25                        | 25            | 17            | 16            | 18            | 25                        | 37            | 40            | 32            | 31            |
| Sex                           | 0                            | 6                        | 8            | 7            | 3            | 5            | 11                        | 25            | 21            | 16            | 17            | 23                        | 20            | 27            | 16            | 21            | 25                        | 35            | 25            | 31            | 32            |
| Steroid                       | 1                            | 15                       | 7            | 7            | 11           | 5            | 18                        | 15            | 10            | 12            | 17            | 21                        | 23            | 24            | 25            | 28            | 32                        | 30            | 23            | 29            | 34            |
| Antivirals                    | 0                            | 6                        | 14           | 9            | 10           | 8            | 17                        | 14            | 13            | 17            | 15            | 27                        | 20            | 30            | 26            | 19            | 30                        | 23            | 35            | 37            | 30            |
| Fatigue                       | 1                            | 8                        | 7            | 9            | 3            | 10           | 16                        | 16            | 13            | 17            | 11            | 26                        | 20            | 26            | 23            | 20            | 32                        | 34            | 26            | 36            | 20            |
| Malaise                       | 1                            | 10                       | 8            | 6            | 9            | 9            | 13                        | 18            | 14            | 16            | 22            | 23                        | 16            | 21            | 22            | 35            | 31                        | 30            | 28            | 36            | 40            |
| Anorexia                      | 1                            | 8                        | 9            | 7            | 12           | 8            | 9                         | 19            | 20            | 15            | 14            | 24                        | 23            | 22            | 28            | 25            | 26                        | 30            | 35            | 34            | 33            |
| Big Liver                     | 10                           | 12                       | 22           | 20           | 24           | 18           | 26                        | 25            | 17            | 23            | 24            | 33                        | 27            | 30            | 30            | 33            | 42                        | 32            | 46            | 33            | 44            |
| Firm Liver                    | 11                           | 22                       | 16           | 16           | 20           | 19           | 27                        | 18            | 34            | 23            | 27            | 35                        | 27            | 25            | 38            | 36            | 39                        | 43            | 43            | 41            | 40            |
| Spl. Palp.                    | 5                            | 9                        | 9            | 20           | 13           | 12           | 20                        | 17            | 22            | 20            | 19            | 23                        | 32            | 23            | 25            | 34            | 35                        | 36            | 33            | 33            | 31            |
| Spiders                       | 5                            | 13                       | 11           | 14           | 10           | 9            | 23                        | 24            | 23            | 20            | 16            | 26                        | 26            | 27            | 35            | 27            | 38                        | 36            | 34            | 46            | 32            |
| Ascites                       | 5                            | 13                       | 11           | 11           | 12           | 10           | 18                        | 18            | 22            | 22            | 17            | 29                        | 29            | 26            | 36            | 23            | 30                        | 31            | 29            | 37            | 32            |
| Varices                       | 5                            | 12                       | 18           | 13           | 12           | 15           | 19                        | 18            | 22            | 21            | 23            | 34                        | 28            | 29            | 27            | 31            | 40                        | 30            | 36            | 36            | 36            |
| Bilirubin                     | 6                            | 12                       | 15           | 16           | 12           | 13           | 19                        | 15            | 21            | 20            | 18            | 24                        | 28            | 32            | 29            | 28            | 38                        | 46            | 41            | 41            | 32            |
| Alk. Phos.                    | 29                           | 34                       | 38           | 36           | 35           | 32           | 43                        | 36            | 40            | 42            | 47            | 47                        | 42            | 47            | 48            | 50            | 54                        | 58            | 53            | 55            | 58            |
| SGOT                          | 4                            | 14                       | 12           | 16           | 7            | 13           | 22                        | 22            | 14            | 21            | 22            | 26                        | 28            | 27            | 25            | 20            | 35                        | 32            | 26            | 33            | 44            |
| Albumin                       | 16                           | 27                       | 23           | 21           | 21           | 23           | 36                        | 29            | 25            | 31            | 27            | 41                        | 38            | 36            | 45            | 29            | 49                        | 34            | 40            | 43            | 43            |
| ProTime                       | 67                           | 72                       | 72           | 69           | 70           | 72           | 74                        | 76            | 76            | 75            | 80            | 76                        | 79            | 83            | 88            | 75            | 80                        | 81            | 82            | 84            | 73            |
| Histology                     | 0                            | 7                        | 8            | 7            | 8            | 10           | 17                        | 17            | 16            | 13            | 8             | 17                        | 21            | 29            | 18            | 20            | 29                        | 34            | 38            | 33            | 29            |
| Class Label                   | 0                            | 0                        | 0            | 0            | 0            | 0            | 0                         | 0             | 0             | 0             | 0             | 0                         | 0             | 0             | 0             | 0             | 0                         | 0             | 0             | 0             | 0             |
| <b>Total # missing values</b> | <b>167</b>                   | <b>311</b>               | <b>313</b>   | <b>311</b>   | <b>299</b>   | <b>294</b>   | <b>441</b>                | <b>435</b>    | <b>439</b>    | <b>439</b>    | <b>436</b>    | <b>580</b>                | <b>552</b>    | <b>581</b>    | <b>600</b>    | <b>572</b>    | <b>710</b>                | <b>712</b>    | <b>713</b>    | <b>750</b>    | <b>714</b>    |

\* Dataset #x-y: x represents the percentage of missing values and y is the number of the dataset.
